# Supplementary material for: A structural paradigm for 3-periodic semiregular (46.69)-hxg net with high-symmetry hexagonal geometry, constructed from the linear [Cd2NaO6(H2O)6] SBUs and a flexible 6,6’-dithiodinicotinate linker
Source: Royal Society of Chemistry journal article supplement (doi:10.1039/c2cc31905e), 2012-01-01
Supplement: c2cc31905e.pdf [file c2cc31905e.pdf]

*Electronic Supplementary Information (ESI) for*

**A structural paradigm for 3-periodic semiregular (4<sup>6</sup>.6<sup>9</sup>)-hxx net with  
high-symmetry hexagonal geometry, constructed from the linear  
[Cd<sub>2</sub>NaO<sub>6</sub>(H<sub>2</sub>O)<sub>6</sub>] SBUs and a flexible 6,6'-dithiodinicotinate linker**

**Chun-Sen Liu,<sup>a</sup> Xiao-Gang Yang,<sup>a</sup> Min Hu,<sup>a</sup> Miao Du<sup>\*b</sup> and Shao-Ming Fang<sup>\*a</sup>**

<sup>a</sup> Zhengzhou University of Light Industry, Henan Provincial Key Lab of Surface & Interface Science, Zhengzhou,  
Henan 450002, P. R. China. E-mail: [smfang@zzuli.edu.cn](mailto:smfang@zzuli.edu.cn) (S.M.F.)

<sup>b</sup> College of Chemistry, Tianjin Key Laboratory of Structure and Performance for Functional Molecule, Tianjin  
Normal University, Tianjin 300387, P. R. China. E-mail: [dumiao@public.tpt.tj.cn](mailto:dumiao@public.tpt.tj.cn) (M.D.)

***Chem. Commun.***

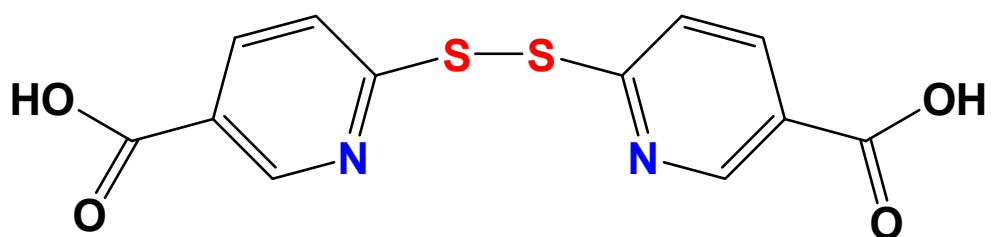

**6,6'-dithiodinicotinic acid (H<sub>2</sub>dtdn)**

**Chart S1.** Chemical structure of the flexible H<sub>2</sub>dtdn ligand.

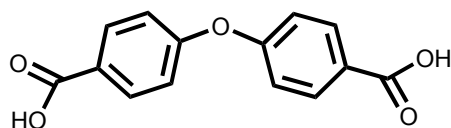

4,4'-oxydibenzoic acid

1. X.-L. Wang, C. Qin, E.-B. Wang, Y.-G. Li, Z.-M. Su, L. Xu and L. Carlucci, *Angew. Chem., Int. Ed.*, 2005, **44**, 5824.
2. X.-L. Wang, C. Qin, E.-B. Wang, Y.-G. Li and Z.-M. Su, *Chem. Commun.*, 2005, 5450.
3. Y. Ma, Z.-B. Han, Y.-K. He and L.-G. Yang, *Chem. Commun.*, 2007, 4107.
4. P. Mahata, A. Sundaresan and S. Natarajan, *Chem. Commun.*, 2007, 4471.
5. J. Zhang, S.-M. Chen and X.-H. Bu, *Angew. Chem., Int. Ed.*, 2008, **47**, 5434.
6. P. Mahata, S. Natarajan, P. Panissod and M. Drillon, *J. Am. Chem. Soc.*, 2009, **131**, 10140.

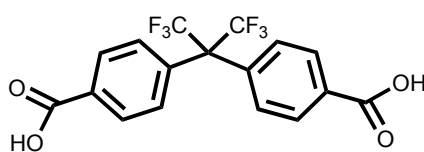

4,4'-(hexafluoroisopropylidene)bis(benzoic acid)

1. L. Pan, M. B. Sander, X.-Y. Huang, J. Li, M. Smith, E. Bittner, B. Bockrath and J. K. Johnson, *J. Am. Chem. Soc.*, 2004, **126**, 1308.
2. A. Monge, N. Snejko, E. Gutiérrez-Puebla, M. Medina, C. Cascales, C. Ruiz-Valero, M. Iglesias and B. Gómez-Lor, *Chem. Commun.*, 2005, 1291.
3. L. Pan, D. H. Olson, L. R. Ciemmolonski, R. Heddy and J. Li, *Angew. Chem., Int. Ed.*, 2006, **45**, 616.
4. B. V. Harbuzaru, A. Corma, F. Rey, P. Atienzar, J. L. Jordá, H. García, D. Ananias, L. D. Carlos and J. Rocha, *Angew. Chem., Int. Ed.*, 2008, **47**, 1080.

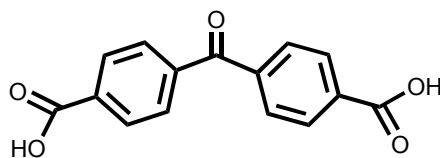

4,4'-carbonyldibenzoic acid

1. X.-L. Wang, C. Qin, E.-B. Wang and Z.-M. Su, *Chem. Eur. J.*, 2006, **12**, 2680.
2. D. Tanaka, K. Nakagawa, M. Higuchi, S. Horike, Y. Kubota, T. C. Kobayashi, M. Takata and S. Kitagawa, *Angew. Chem., Int. Ed.*, 2008, **47**, 3914.
3. H. Furukawa, J. Kim, N. W. Ockwig, M. O'Keeffe and O. M. Yaghi, *J. Am. Chem. Soc.*, 2008, **130**, 11650.
4. H. J. Park and M. P. Suh, *Chem. Eur. J.*, 2008, **14**, 8812.
5. H. J. Park and M. P. Suh, *Chem. Commun.*, 2010, **46**, 610.

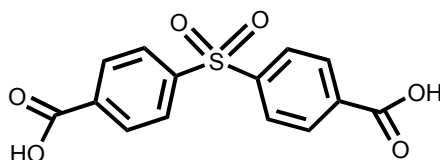

4,4'-sulfonyldibenzoic acid

1. H. Furukawa, J. Kim, N. W. Ockwig and M. O'Keeffe, O. M. Yaghi, *J. Am. Chem. Soc.*, 2008, **130**, 11650.
2. W.-J. Zhuang, H.-L. Sun, H.-B. Xu, Z.-M. Wang, S. Gao and L.-P. Jin, *Chem. Commun.*, 2010, **46**, 4339.
3. D.-S. Li, F. Fu, J. Zhao, Y.-P. Wu, M. Du, K. Zou, W.-W. Dong and Y.-Y. Wang, *Dalton Trans.*, 2010, **39**, 11522.

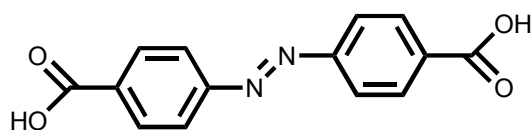

4,4'-azodibenzoic acid

1. T. M. Reineke, M. Eddaoudi, D. Moler, M. O'Keeffe and O. M. Yaghi, *J. Am. Chem. Soc.*, 2000, **122**, 4843.
2. P. S. Mukherjee, N. Das, Y. K. Kryschenko, A. M. Arif and P. J. Stang, *J. Am. Chem. Soc.*, 2004, **126**, 2464.
3. B.-L. Chen, S.-Q. Ma, E. J. Hurtado, E. B. Lobkovsky and H.-C. Zhou, *Inorg. Chem.*, 2007, **46**, 8490.
4. H. Furukawa, J. Kim, N. W. Ockwig, M. O'Keeffe and O. M. Yaghi, *J. Am. Chem. Soc.*, 2008, **130**, 11650.

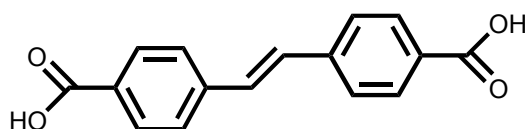

4,4'-stilbenedicarboxylic acid

1. C. A. Bauer, T. V. Timofeeva, T. B. Settersten, B. D. Patterson, V. H. Liu, B. A. Simmons and M. D. Allendorf, *J. Am. Chem. Soc.*, 2007, **129**, 7136.
2. A.-L. Cheng, N. Liu, Y.-F. Yue, Y.-W. Jiang, E.-Q. Gao, C.-H. Yan and M.-Y. He, *Chem. Commun.*, 2007, 407.
3. J. Yang, J.-F. Ma, S. R. Batten and Z.-M. Su, *Chem. Commun.*, 2008, 2233.

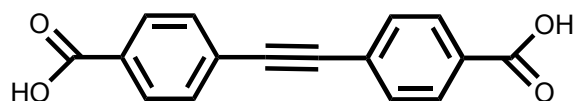

4,4'-ethyne-1,2-bis(benzoic acid)

1. T. Gadzikwa, B.-S. Zeng, J. T. Hupp and S. T. Nguyen, *Chem. Commun.*, 2008, 3672.
2. B. T. N. Pham, L. M. Lund and D.-T. Song, *Inorg. Chem.*, 2008, **47**, 6329.

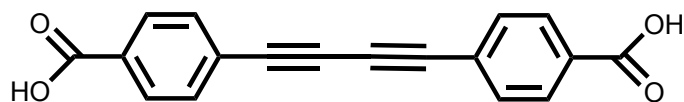

4,4'-diacetylene-1,4-bis(benzoic acid)

1. D. Britt, D. Tranchemontagne and O. M. Yaghi, *PNAS.*, 2008, **105**, 11623.

**Scheme S1** Eight 4,4'-dibenzoic acid ligands reported in the literatures with different spacers.

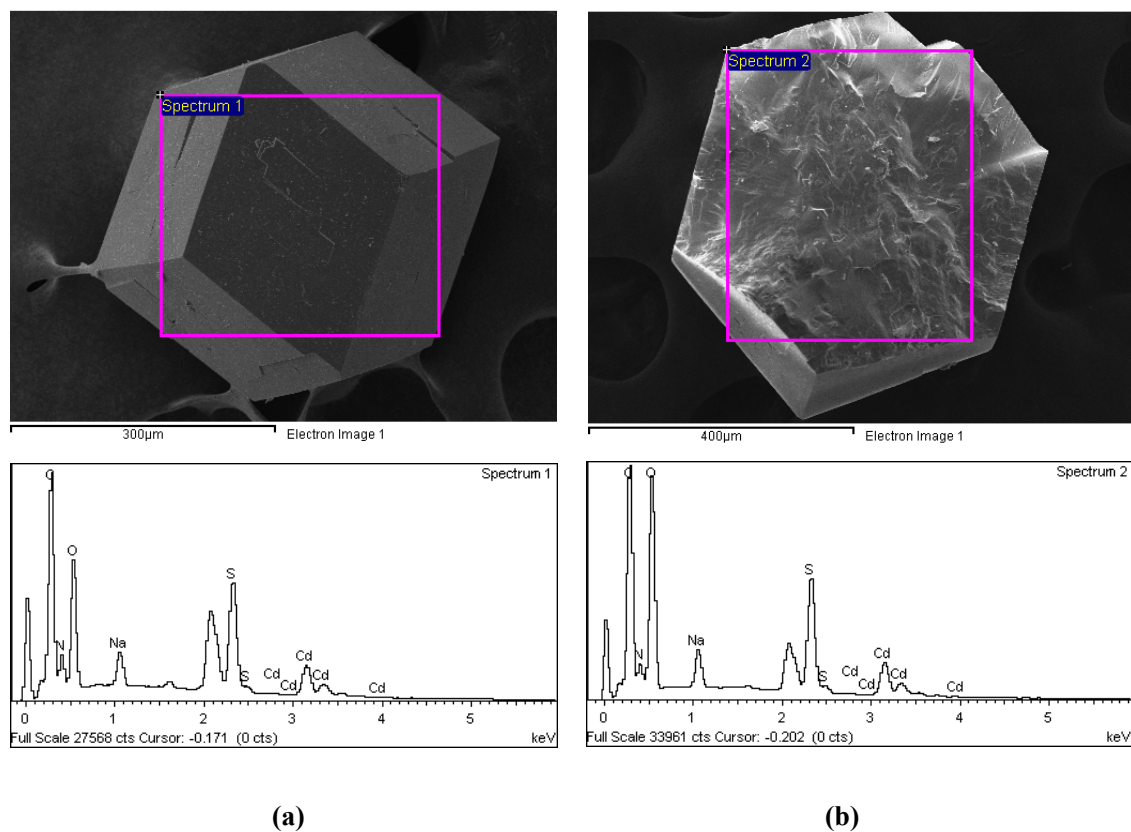

**Fig. S1** Scanning electron microscopy (SEM) and energy-dispersive X-ray spectrometry (EDS) for (a) the surface and (b) the interior (after a single crystal is cut) of a crystal sample for **1**.

**Results.** The detected surface atom ratios for C, N, O, Na, S, and Cd are 31.93, 6.98, 29.73, 1.98, 13.41, and 15.97% and the corresponding interior atom ratios are 31.58, 5.85, 33.25, 1.43, 12.37, and 15.52% (calcd: C: 31.45, N: 6.11, O: 30.41, Na: 1.67, S: 13.99, and Cd: 16.35%). Notably, the experimental data (carried out on a JSM-6490 scanning electron microscope) shown herein are the mean value for ten pieces of crystals.

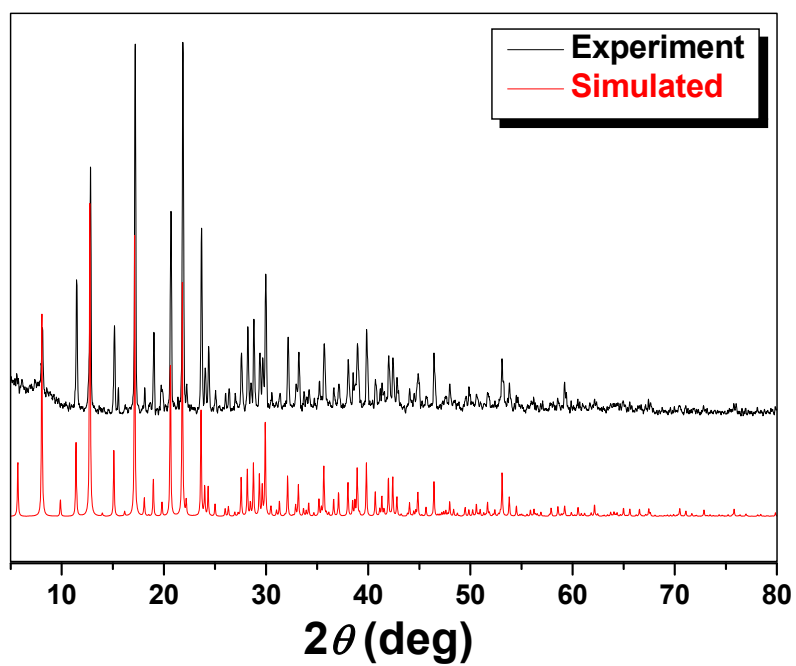

**Fig. S2** X-ray powder diffraction (XRPD) pattern of **1**.

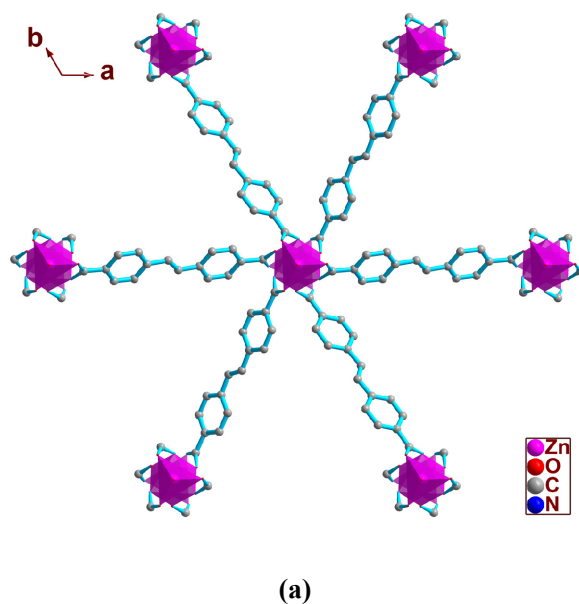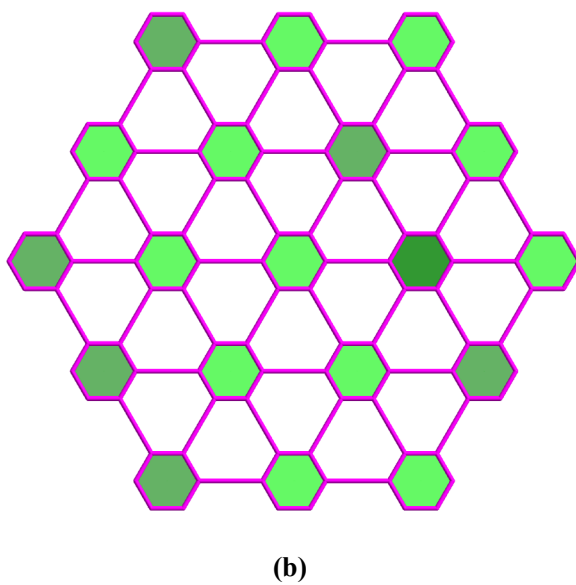

**Fig. S3** (a) View of the 6-connected trinuclear Zn(II) cluster node (the coordinated DMF molecules are removed for clarity) and (b) the augmented 2-D  $3^6$  network (please see *ref. 3d* in the main text for details).

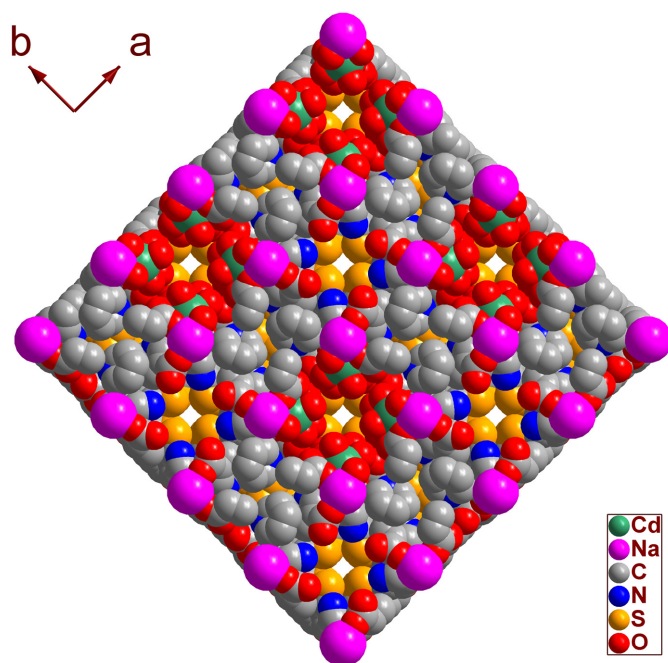

**Fig. S4** Space-filling diagram of **1** viewed along the [001] direction.



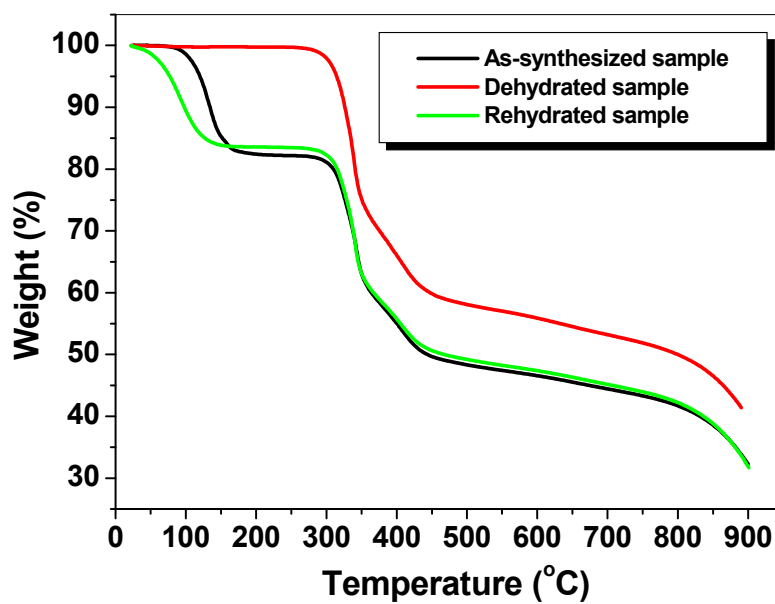

**Fig. S5** Thermal gravimetric analysis (TGA) curve of **1** under different conditions.

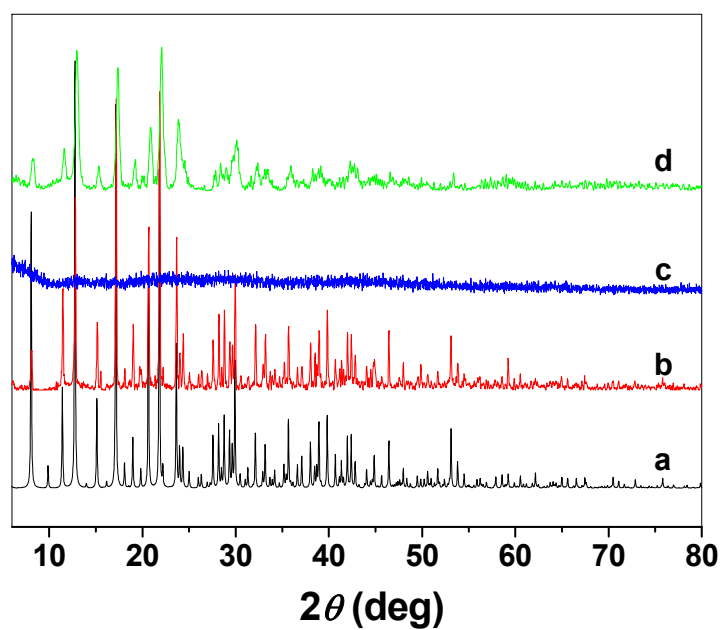

**Fig. 6** XRPD patterns of **1**: (a) simulated pattern as well as experimental patterns for (b) the as-synthesized sample, (c) the dehydrated sample, and (d) the rehydrated sample.

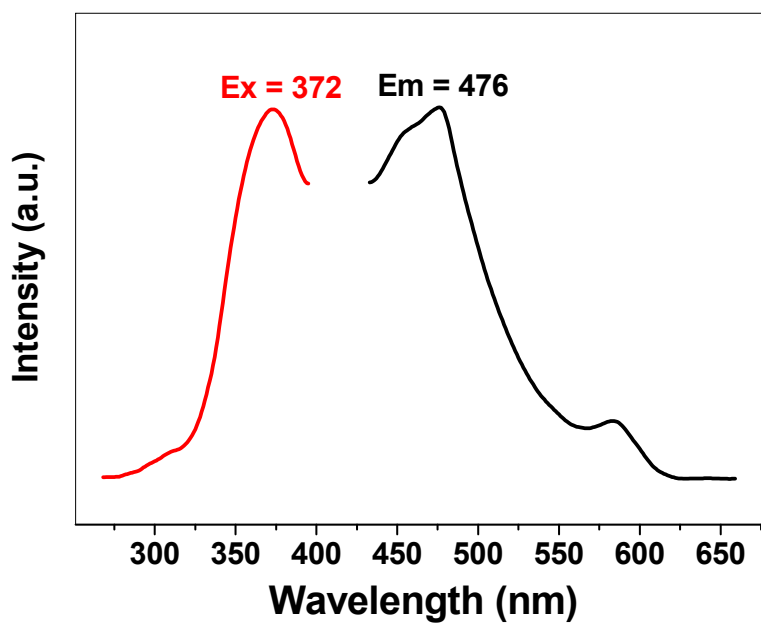

(a)

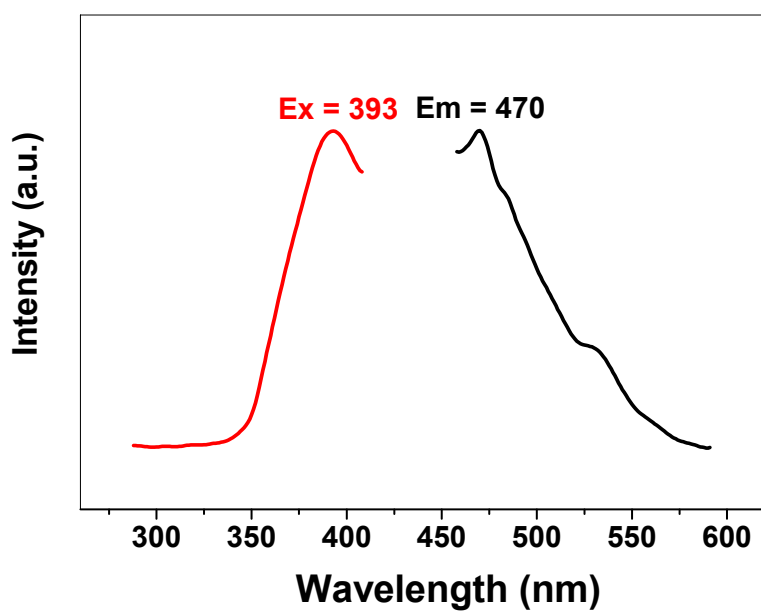

(b)

**Fig. S7** Solid-state excitation and emission spectra of (a) **1** and (b) the free **dtdn** ligand.

**Table S1** Selected bond distances (Å) and bond angles (°) for **1**

---

|                                        |            |                                        |            |
|----------------------------------------|------------|----------------------------------------|------------|
| Cd1–O3 <sup>#1</sup>                   | 2.285(3)   | Cd1–O1 <sup>#1</sup>                   | 2.318(3)   |
| Cd1–O3                                 | 2.285(3)   | Cd1–O1                                 | 2.318(3)   |
| Cd1–O3 <sup>#2</sup>                   | 2.285(3)   | Cd1–O1 <sup>#2</sup>                   | 2.318(3)   |
| Na1–O1                                 | 2.362(3)   | Na1–O1 <sup>#1</sup>                   | 2.362(3)   |
| O3 <sup>#1</sup> –Cd1–O3               | 88.22(14)  | O3 <sup>#2</sup> –Cd1–O1               | 104.52(12) |
| O3 <sup>#1</sup> –Cd1–O3 <sup>#2</sup> | 88.22(14)  | O1 <sup>#1</sup> –Cd1–O1               | 80.69(10)  |
| O3–Cd1–O3 <sup>#2</sup>                | 88.22(14)  | O3 <sup>#1</sup> –Cd1–O1 <sup>#2</sup> | 104.52(12) |
| O3 <sup>#1</sup> –Cd1–O1 <sup>#1</sup> | 87.84(11)  | O3–Cd1–O1 <sup>#2</sup>                | 166.53(12) |
| O3–Cd1–O1 <sup>#1</sup>                | 104.52(12) | O3 <sup>#2</sup> –Cd1–O1 <sup>#2</sup> | 87.84(11)  |
| O3 <sup>#2</sup> –Cd1–O1 <sup>#1</sup> | 166.53(12) | O1 <sup>#1</sup> –Cd1–O1 <sup>#2</sup> | 80.69(10)  |
| O3 <sup>#1</sup> –Cd1–O1               | 166.53(12) | O1–Cd1–O1 <sup>#2</sup>                | 80.69(10)  |
| O3–Cd1–O1                              | 87.84(11)  | Cd1 <sup>#3</sup> –Na1–Cd1             | 180        |
| O1 <sup>#3</sup> –Na1–O1               | 180        | O1 <sup>#1</sup> –Na1–O1               | 78.93(9)   |

---

Symmetry codes: #1 =  $-z + 1/2, -x + 1/2, y$ ; #2 =  $-y + 1/2, z, -x + 1/2$ ; #3 =  $-x + 1, -y, -z$ .
